# Supplementary material for: Site-specific encoding of photoactivity and photoreactivity into antibody fragments
Source: PubMed Central journal article supplement (PMC10229432; doi:10.1038/s41589-022-01251-9), 2023-02-16

**Source data for Figure 3 showing full length gel images:**

**Source data for Figure 3c:**

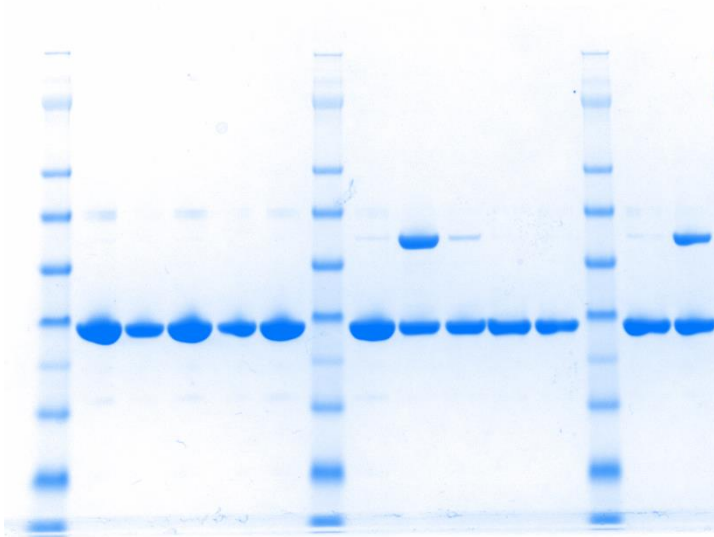

**Source data for Figure 3d (Left Panel):**

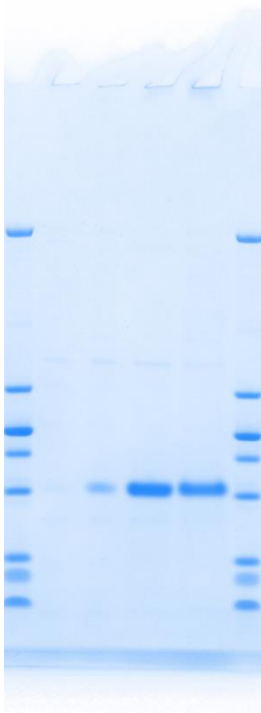

Source data for Figure 3d (Right Panel):

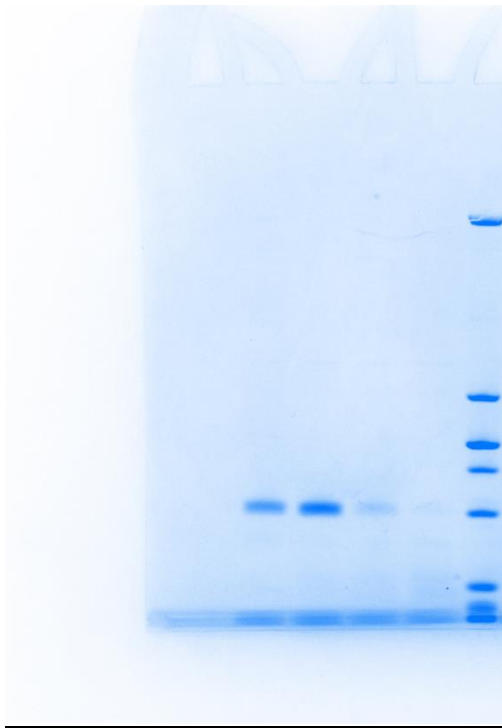

Supplement: 41589_2022_1251_MOESM6_ESM.pdf [file 41589_2022_1251_MOESM6_ESM.pdf]
