# Supplementary material for: Site-specific encoding of photoactivity and photoreactivity into antibody fragments
Source: PubMed Central journal article supplement (PMC10229432; doi:10.1038/s41589-022-01251-9), 2023-02-16

**Source data for Extended Data Figure 10 showing full length gel images:**

**Source data for Extended Data Figure 10- Left Panel, Coomassie Stained gel:**

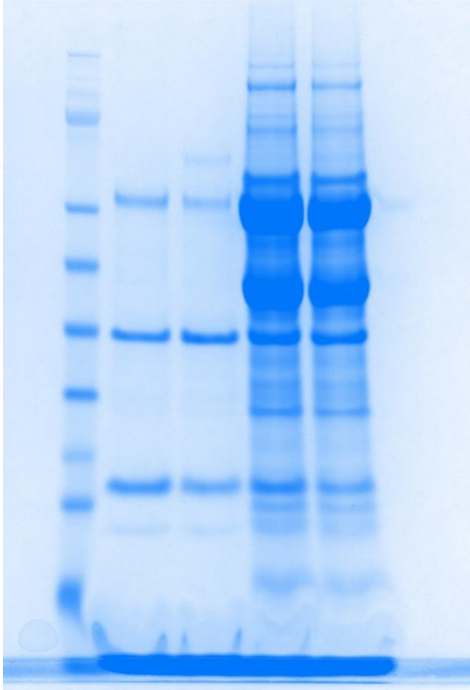

**Source data for Extended Data Figure 10- Right Panel, Western blot image:**

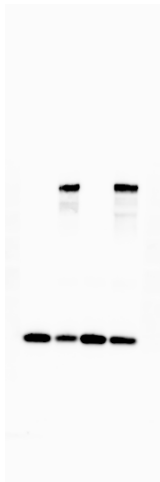

Source data for Extended Data Figure 10- Right Panel, Western blot image taken using white light for protein ladder:

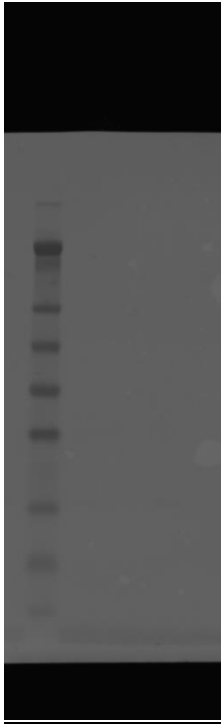

Supplement: 41589_2022_1251_MOESM20_ESM.pdf [file 41589_2022_1251_MOESM20_ESM.pdf]
